# Supplementary material for: Electrochemically modified graphite paper as an advanced electrode substrate for supercapacitor application
Source: Royal Society of Chemistry journal article supplement (doi:10.1039/c9ta04496e), 2019-01-01
Supplement: c9ta04496e1.pdf [file c9ta04496e1.pdf]

**SUPPORTING INFORMATION**

**Electrochemically Modified Graphite Paper as an Advanced Electrode substrate for Supercapacitor Application**

*Debasish Mandal, Parimal Routh,<sup>‡</sup> Ashok K. Mahato and Arun K. Nandi\**

Polymer Science Unit, School of Material Science, Indian Association for the Cultivation of Science, Jadavpur, Kolkata 700 032, India

<sup>‡</sup> Department of Chemistry, Charuchandra College, 22 Lake Road, Kolkata 700 029, India

\* For correspondence: A. K. Nandi    Email: [psuakn@iacs.res.in](mailto:psuakn@iacs.res.in)

Fax: (+) 91 33 2473 2805, Telephone: 91 33 2473 4971 (Extn. 1561)

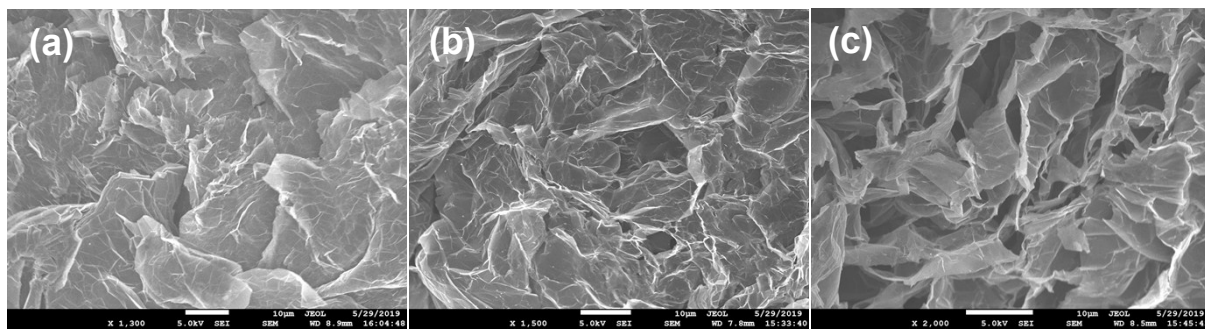

**Figure S1.** FESEM images of (a) ECM-GP5, (b) ECM-GP10 and (c) ECM-GP30.

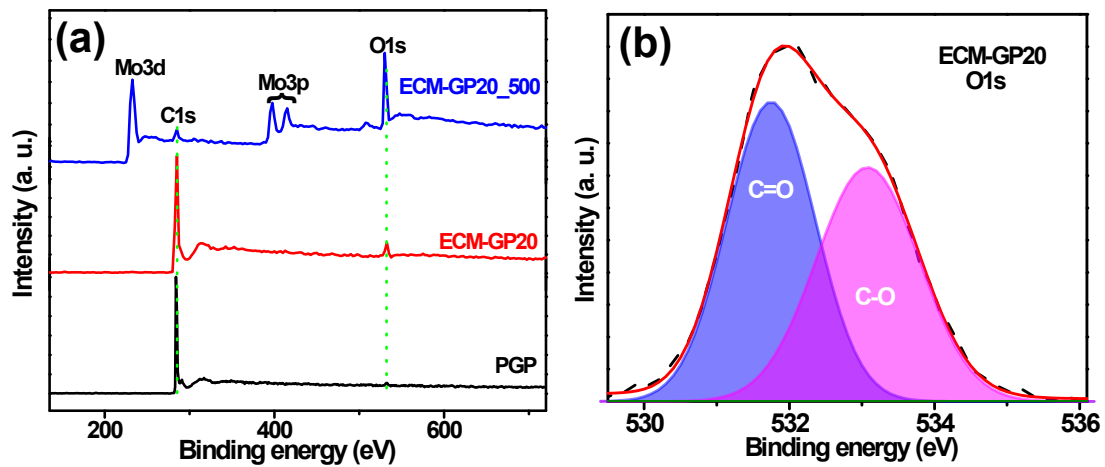

**Figure S2.** (a) represents the XPS survey spectra of PGP, ECM-GP20 and ECM-GP20\_500 electrodes. (b) represents the deconvolution of highly resolved O1s spectra of ECM-GP20 electrode substrate.

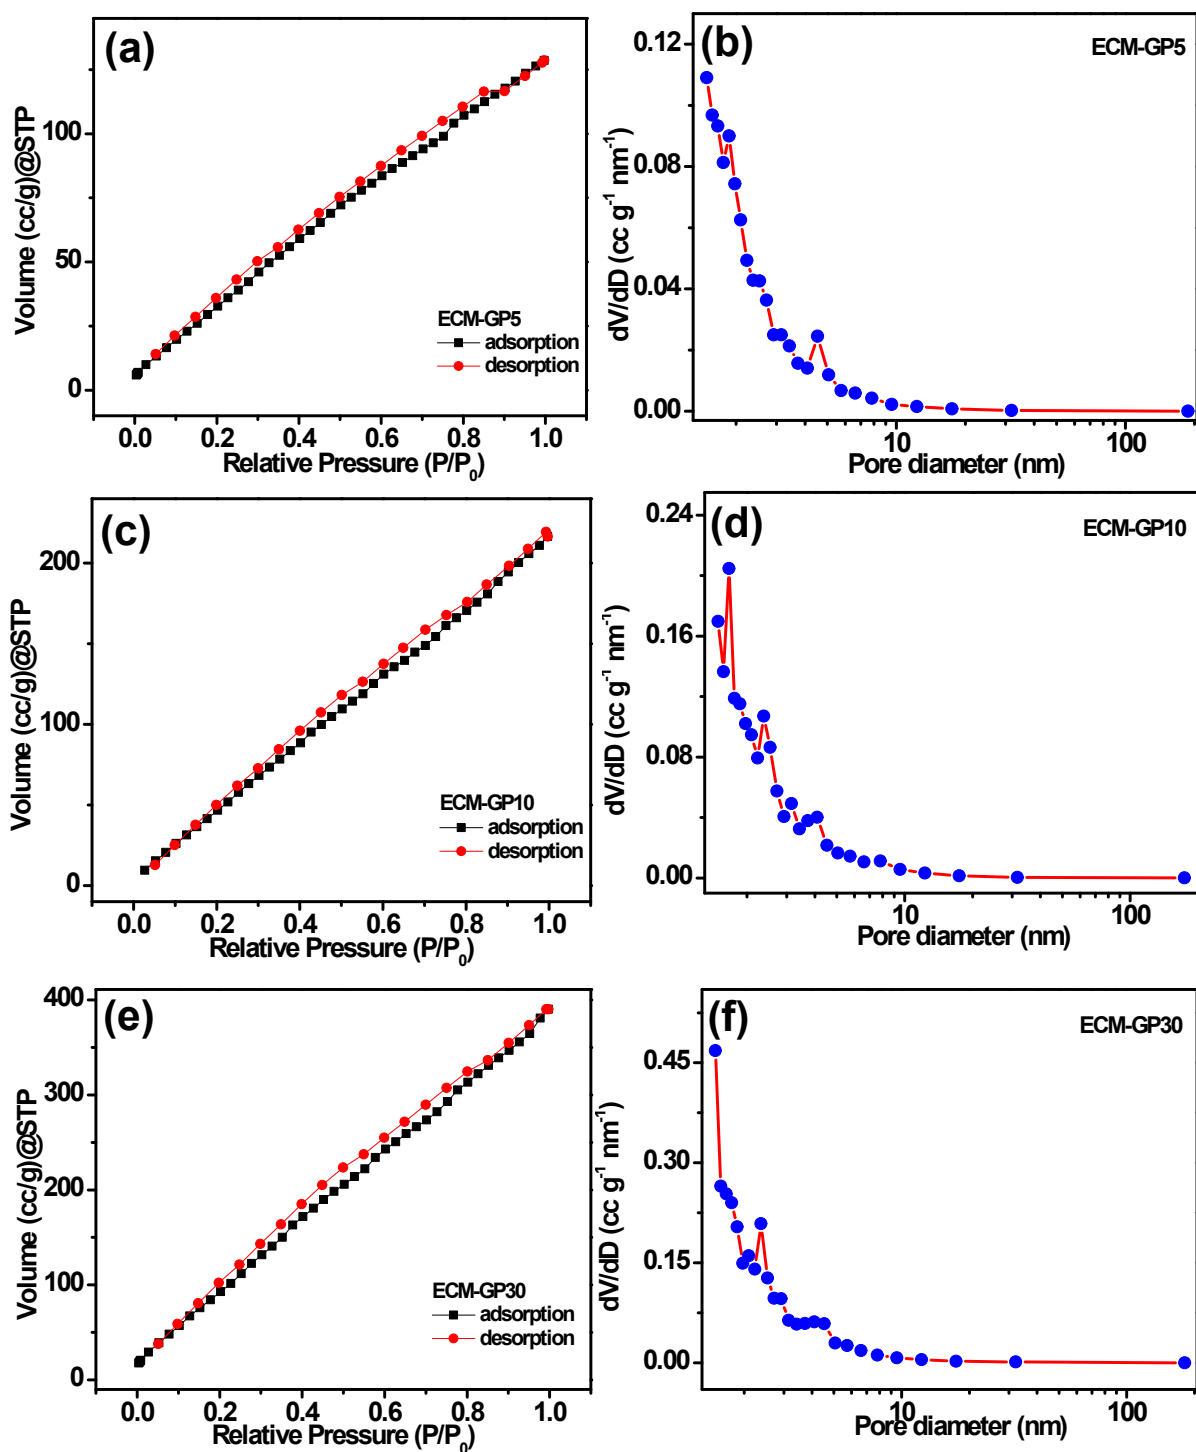

**Figure S3.**  $N_2$  adsorption/desorption isotherm of (a) ECM-GP5 (c) ECM-GP10 and (e) ECM-GP30. (b), (d) and (f) represent the pore size distribution in ECM-GP5, ECM-GP10 and ECM-GP30, respectively.

**Table S1.** Summary of BET surface area and pore volume.

| <b>sample</b> | <b>Surface area (m<sup>2</sup> g<sup>-1</sup>)</b> | <b>Pore volm (cc g<sup>-1</sup>)</b> |
|---------------|----------------------------------------------------|--------------------------------------|
| PGP           | 28.6                                               | 0.04                                 |
| ECM-GP5       | 183                                                | 0.199                                |
| ECM-GP10      | 320                                                | 0.33                                 |
| ECM-GP20      | 560                                                | 0.766                                |
| ECM-GP30      | 517.6                                              | 0.604                                |

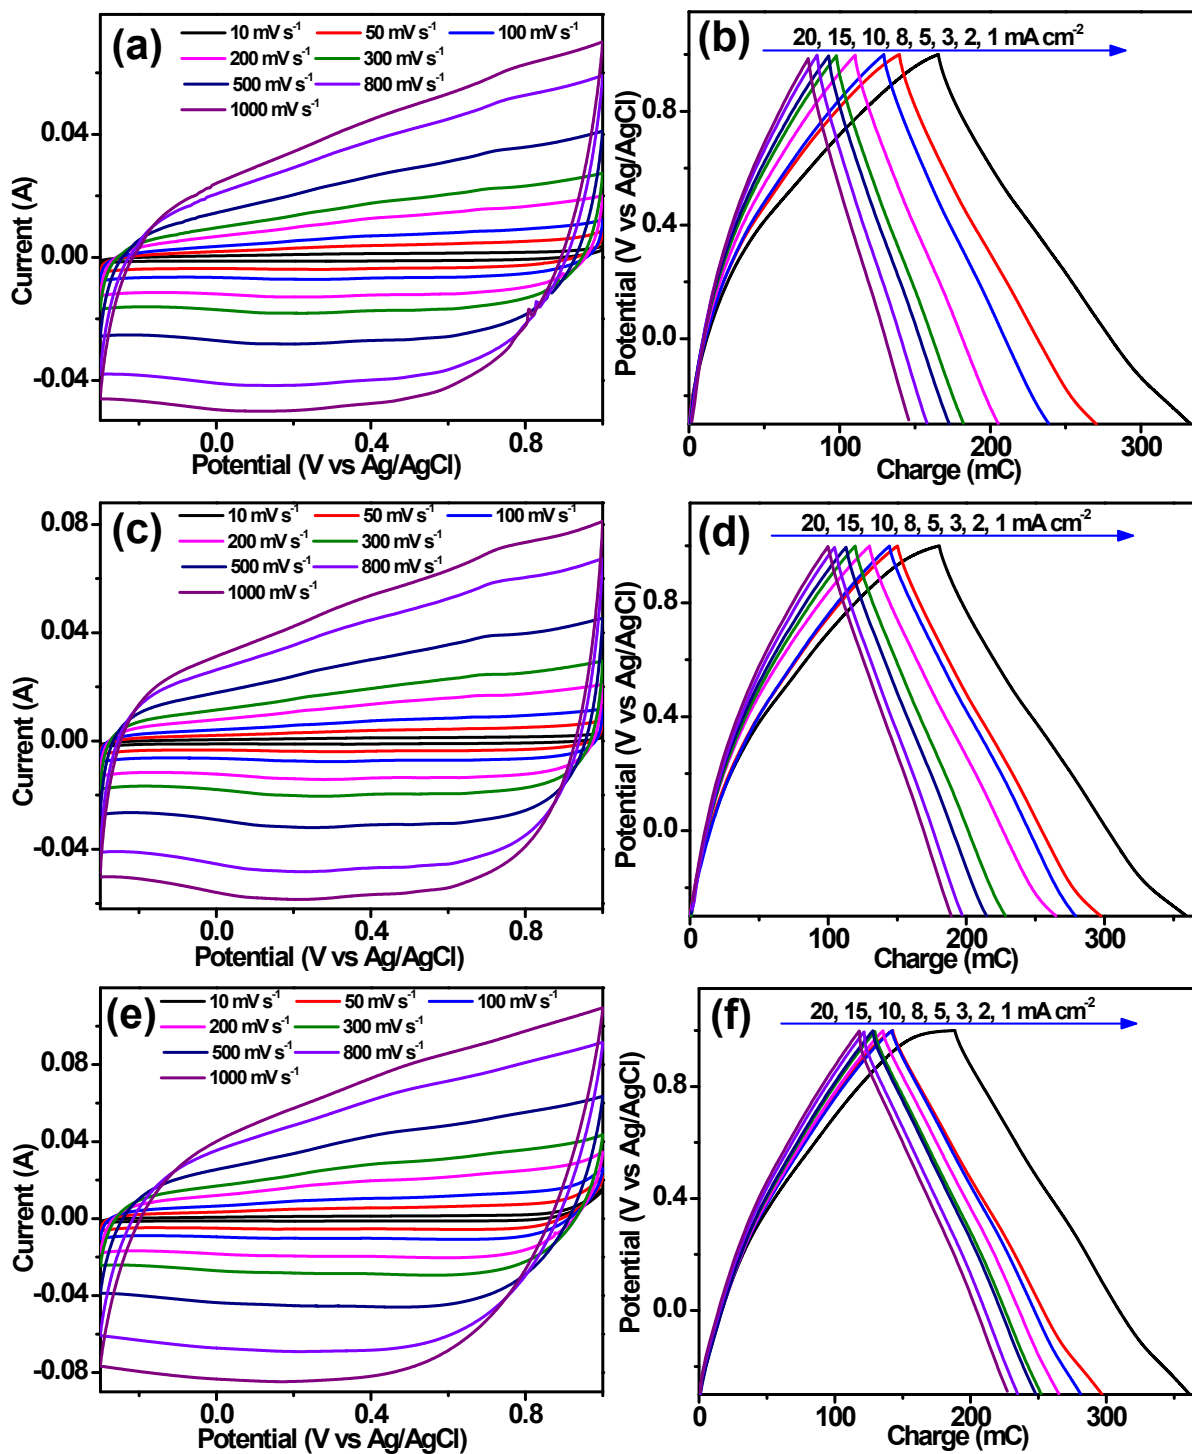

**Figure S4.** (a) CV and (b) GCD plots of ECM-GP5 electrode. (c) CV and (d) GCD plots of ECM-GP10 electrode. (e) CV and (f) GCD plots of ECM-GP30 electrode.

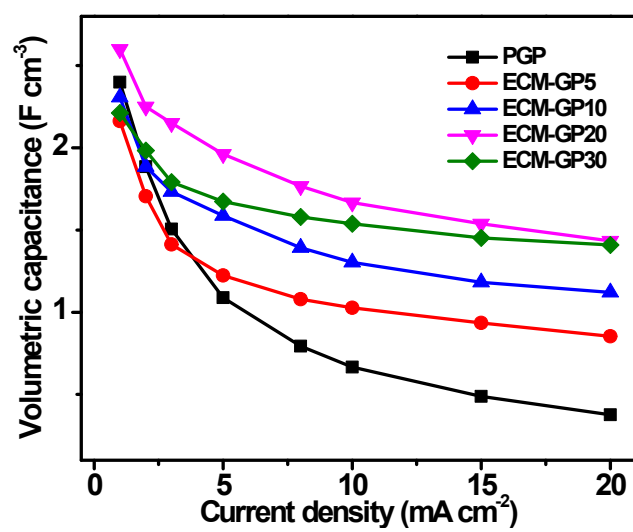

**Figure S5.** Volumetric capacitance of PGP, ECM-GP5, ECM-GP10, ECM-GP20 and ECM-GP30 for different current densities.

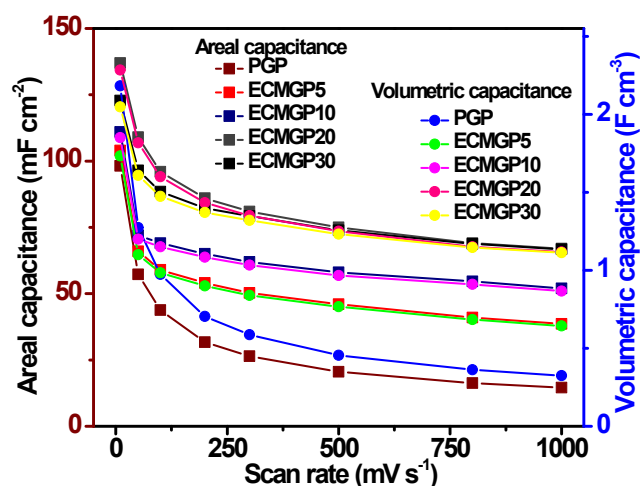

**Figure S6.** Areal and volumetric capacitance of PGP and all ECM-GP electrodes for different scan rates.

The PGP shows capacitance of  $98.2 \text{ mF cm}^{-2}$  ( $2.18 \text{ F cm}^{-3}$ ) at  $10 \text{ mV s}^{-1}$  scan rate having very poor retention ability of 14.87% at  $1 \text{ V s}^{-1}$  compare to that at  $10 \text{ mV s}^{-1}$ . The electrochemical exfoliation-oxidation strategy of graphite paper significantly boosts its supercapacitor properties and it varies with exfoliation time. ECM-GP5, ECM-GP10, ECM-GP20, ECM-GP30 shows areal capacitance of 104, 111, 137 and  $122 \text{ mF cm}^{-2}$  (corresponding volumetric capacitance is 1.73, 1.85, 2.3 and  $2.05 \text{ F cm}^{-3}$ , respectively), respectively, at  $10 \text{ mV s}^{-1}$ , with retention ability of 37.12, 44.85, 48.9 and 54.4%, respectively, at  $1 \text{ V s}^{-1}$  compare to that at  $10 \text{ mV s}^{-1}$ . Here, the regular increment of the capacitance retention ability from ECM-GP5 to ECM-GP30, arises because of more exfoliation of graphite sheets with time and formation of more porous structure (cf. **Figure S1**, **Figure 2** and **Figure S3**). However, the CV curve clearly indicates that among all ECM-GP electrodes ECM-GP20 exhibits best charge storage performance at all scan rates, even better than ECM-GP30 electrode. The reason behind this



is that though with time more exfoliation of graphite sheets take place, but excess exfoliation i.e. more than 20 mins causes detaches of more exfoliated graphite sheets from ECM-GP electrode. So, we focus on only ECM-GP20 electrode for its better electrochemical performance. So, the CV result suggests to use ECM-GP20 as electrode substrate.

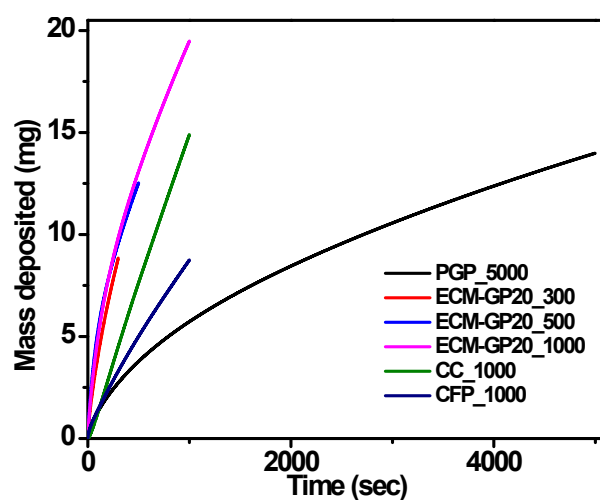

**Figure S7.** Amount of MoO<sub>2</sub> (mg) deposition with time (sec) during preparation of PGP\_5000, ECM-GP20\_300, ECM-GP20\_500, ECM-GP20\_1000, CC\_1000 and CFP\_1000 electrode. The Figure indicates that deposition rate in PGP electrode substrate is very low compare to that at ECM-GP electrodes.

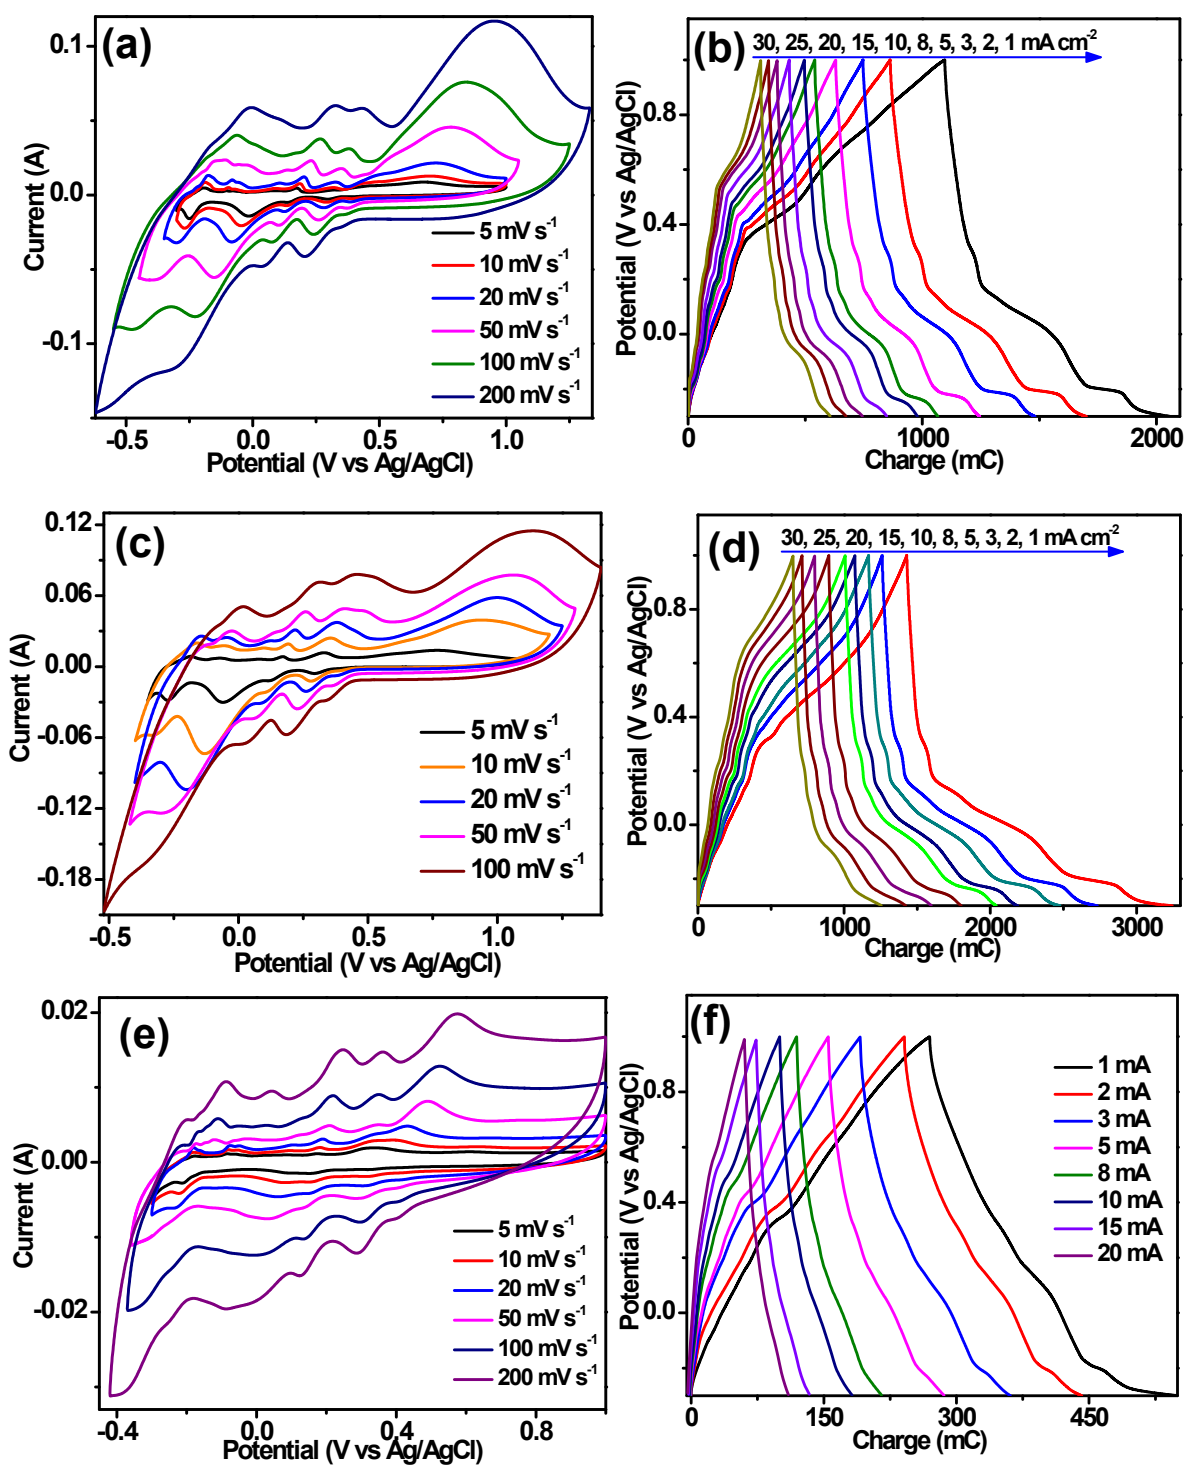

**Figure S8.** (a) CV and (b) GCD plots of ECM-GP20\_300 electrode; (c) and (d) represent CV and GCD plots, respectively of ECM-GP20\_1000 electrode; (e) CV and (f) GCD plot of PGP\_1500 electrode.



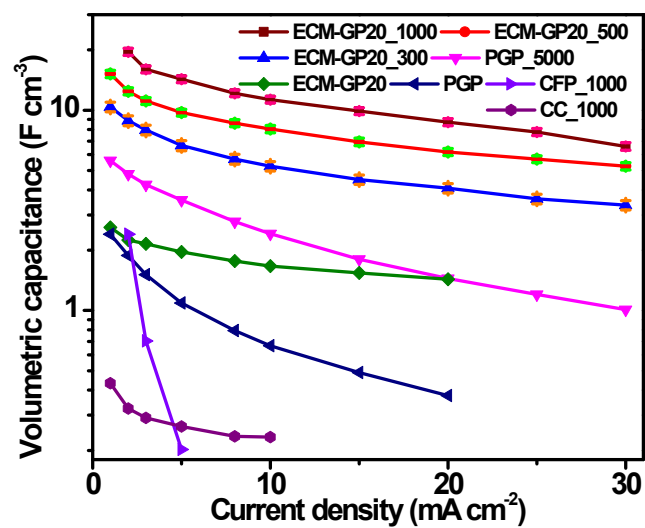

**Figure S9.** Volumetric capacitance of all electrodes (PGP, ECM-GP20, PGP\_5000, ECM-GP20\_300, ECM-GP20\_500, ECM-GP20\_1000, CFP\_1000 and CC\_1000) for different applied current density.

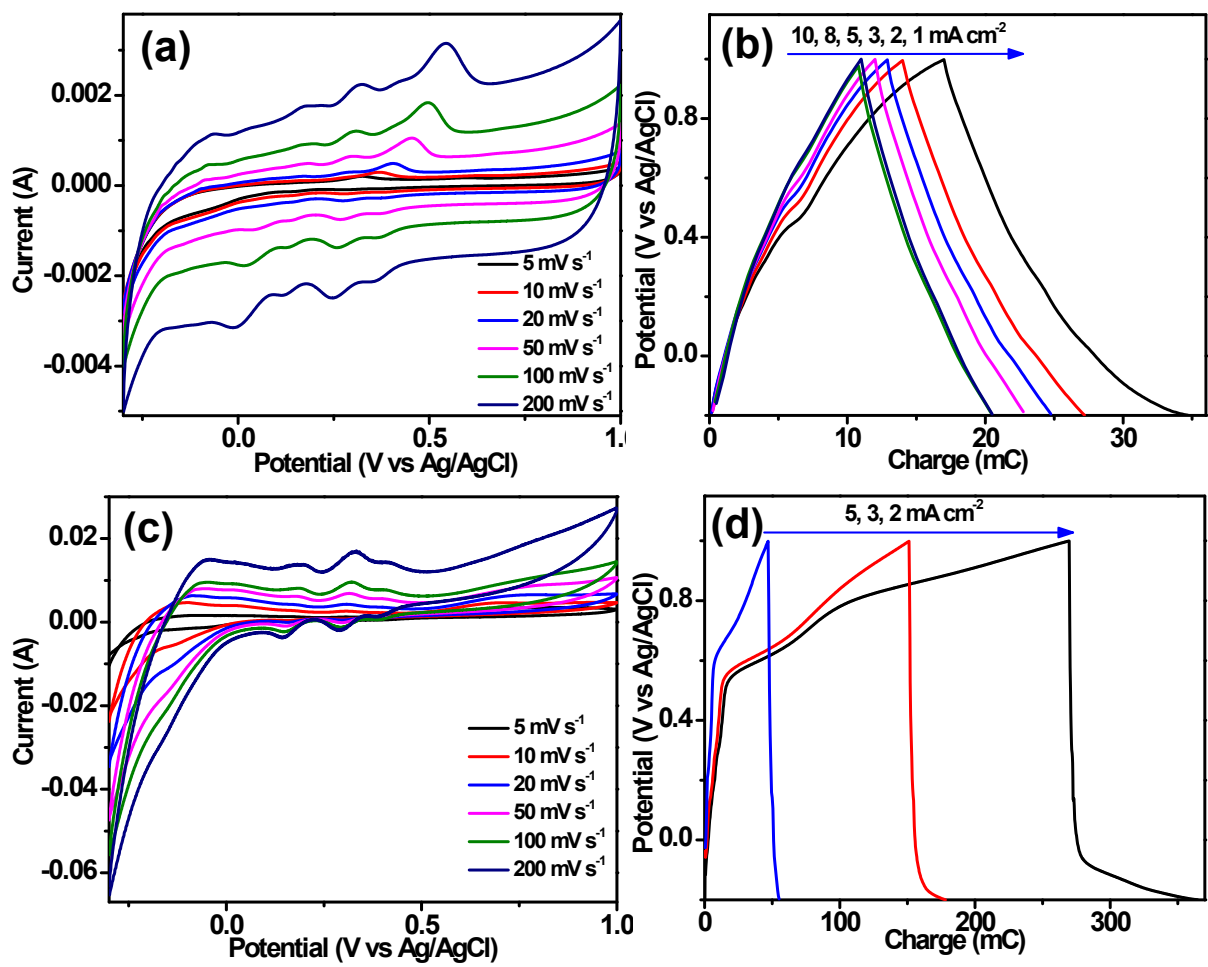

**Figure S10.** (a) CV and (b) GCD plot of CC\_1000 electrode. (c) and (d) represent CV and GCD plot, respectively, of CFP\_1000 electrode.

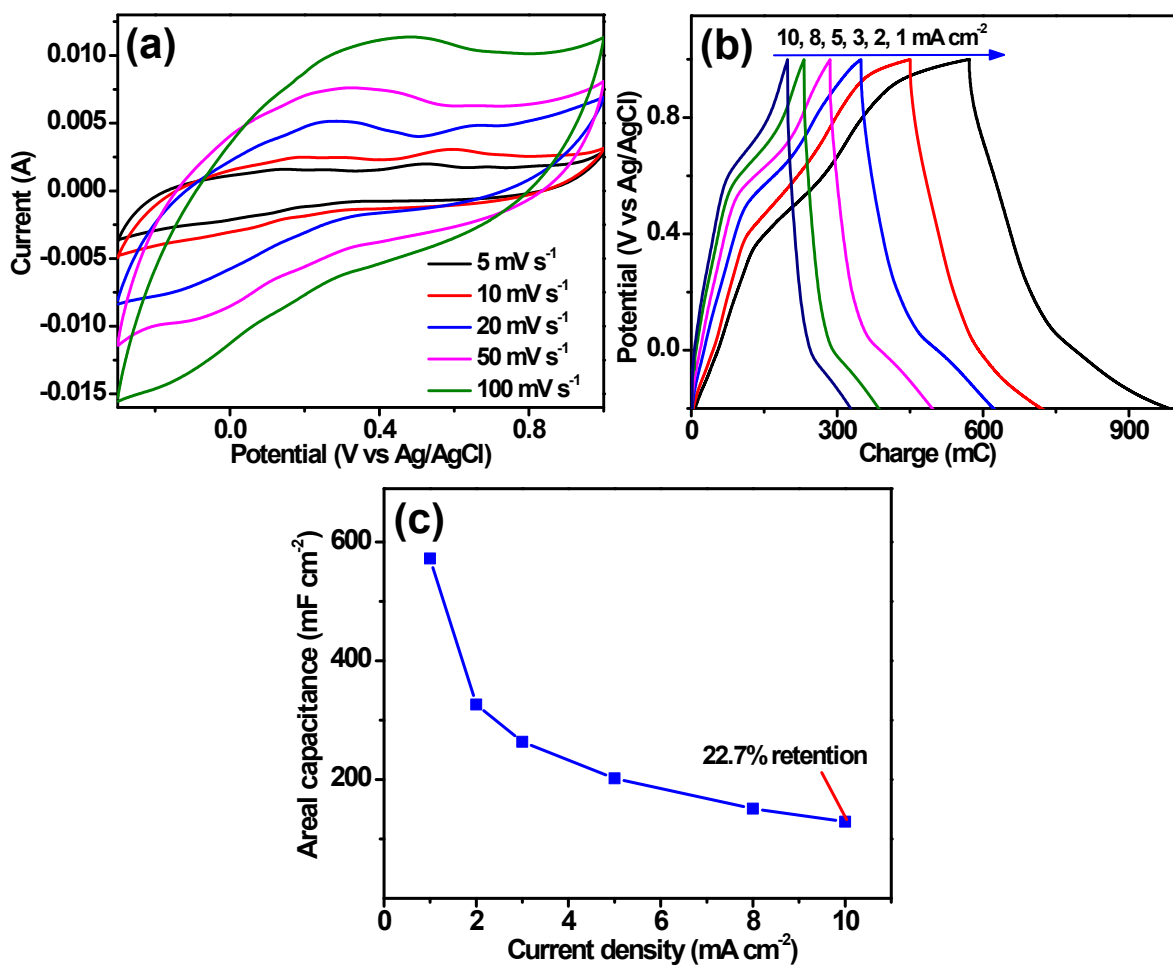

**Figure S11.** (a) CV and (b) GCD plot of ECM-GP20\_500 electrode in 0.25 M tetrabutylammonium hexafluorophosphate (TBAPF<sub>6</sub>, >98%) in acetonitrile (ACN). (c) represents corresponding capacity retention plot of ECM-GP20\_500 electrode with current density in same ionic liquid electrolyte.

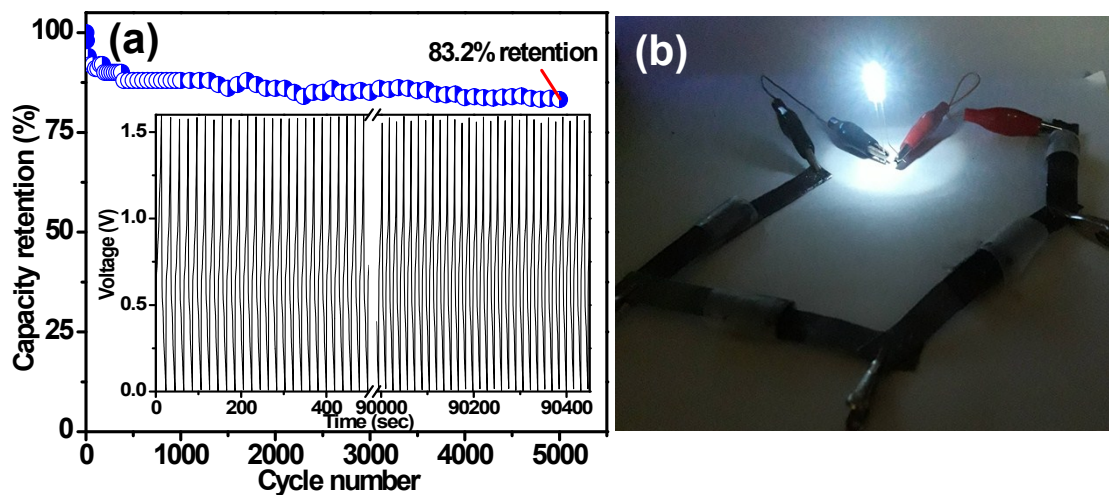

**Figure S12.** (a) Cyclic performance test of ECM-GP\_500// ECM-GP\_500 SSC at 30 mA current; it exhibits 83.2% capacity retention after 5000 cycles. Inset of this figure respective GCD plots are shown. (b) represents optical image of powering of a 3 mm LED bulb by charged SSCs where four SSCs are connected in a series.
